# Supplementary material
Source: HighWire-hosted journal article supplement (https://cmaj.ca/highwire/filestream/58910/field_highwire_adjunct_files/0/dementia-seitz-1-at.pdf)
Supplement: dementia-seitz-1-at.pdf [file dementia-seitz-1-at.pdf]

## **Appendix 1 (as supplied by authors): Search strategy for MEDLINE, EMBASE, PsycINFO**

1. exp Focus Groups/
2. Qualitative Research/
3. exp Interviews as Topic/
4. Interview/
5. exp Physicians, Family/
6. exp Dementia/
7. exp Alzheimer Disease/
8. exp Primary Health Care/
9. (experience\$ or view\$ or opinion\$ or perspective\$).mp. [mp=ti, ab, sh, hw, tn, ot, dm, mf, dv, kw, ps, rs, nm, ui, tc, id, tm]
10. exp "Attitude of Health Personnel"/ or exp Attitude/
11. exp Attitude to Health/
12. Patient Education as Topic/
13. exp Physician-Patient Relations/
14. exp Professional-Family Relations/
15. exp General Practice/
16. medical system.mp.
17. 1 or 2 or 3 or 4 or 9
18. 6 or 7
19. 17 and 18
20. 5 or 8 or 10 or 11 or 12 or 13 or 14 or 15 or 16
21. 19 and 20
22. limit 21 to English

## Search strategy for CINAHL

| Search# | Query                                                                                                                                                                                                                                                                                                                            | Limiters/Expanders                                                 |
|---------|----------------------------------------------------------------------------------------------------------------------------------------------------------------------------------------------------------------------------------------------------------------------------------------------------------------------------------|--------------------------------------------------------------------|
| S1      | (MH "Focus Groups") OR (MH "Qualitative Studies+") OR (MH "Interviews+") OR (MH "Semi-Structured Interview") OR (MH "Structured Interview") OR (MH "Unstructured Interview") OR (MH "Life Experiences") OR "experience*" OR "view*" OR "perspective*" OR "opinion*"                                                              | Search modes -<br>Boolean/Phrase                                   |
| S2      | (MH "Physicians, Family") OR (MH "Primary Health Care") OR (MH "Attitude of Health Personnel+") OR (MH "Attitude to Health+") OR (MH "Patient Education+") OR (MH "Physician-Patient Relations") OR (MH "Professional-Patient Relations+") OR (MH "Professional-Family Relations") OR (MH "Family Practice") OR "medical system" | Search modes -<br>Boolean/Phrase                                   |
| S3      | (MH "Dementia+") OR (MH "Dementia, Vascular+") OR (MH "Dementia, Multi-Infarct") OR (MH "Dementia, Presenile+") OR (MH "Dementia, Senile+") OR (MH "Alzheimer's Disease")                                                                                                                                                        | Search modes -<br>Boolean/Phrase                                   |
| S4      | ((MH "Dementia+") OR (MH "Dementia, Vascular+") OR (MH "Dementia, Multi-Infarct") OR (MH "Dementia, Presenile+") OR (MH "Dementia, Senile+") OR (MH "Alzheimer's Disease")) and (S1 and S2 and S3)                                                                                                                               | Search modes -<br>Boolean/Phrase                                   |
| S5      | ((((MH "Dementia+") OR (MH "Dementia, Vascular+") OR (MH "Dementia, Multi-Infarct") OR (MH "Dementia, Presenile+") OR (MH "Dementia, Senile+") OR (MH "Alzheimer's Disease"))) and (S1 and S2 and S3)) and (S1 and S2 and S3)                                                                                                    | Limiters - English<br>Language<br>Search modes -<br>Boolean/Phrase |
